# Supplementary material for: Pazopanib may reduce bleeding in hereditary hemorrhagic telangiectasia
Source: Angiogenesis. 2018 Sep 6;22(1):145–55. doi: 10.1007/s10456-018-9646-1 (PMC6510884; doi:10.1007/s10456-018-9646-1)
Supplement: Supplementary file 1 — Supplementary material 1 (PDF 72 KB) [file 10456_2018_9646_MOESM1_ESM.pdf]

**Supplementary Table of all adverse events. Seven patients experienced a total of 19 adverse events (AE) as detailed. All events were considered mild or moderate in severity, except one event (\*) with elevation of alanine aminotransferase.**

| <b>System Organ Class<br/>Preferred Term</b>    | <b>GW786034: 50 mg QD<br/>(N=7)</b> |
|-------------------------------------------------|-------------------------------------|
| Any Event, n (%)                                | 7 (100)                             |
| Infections and infestations, n (%)              | 0                                   |
| Any event                                       | 4 (57)                              |
| Bronchitis                                      | 2 (29)                              |
| Nasopharyngitis                                 | 1 (14)                              |
| Otitis media                                    | 1 (14)                              |
| Pharyngitis streptococcal                       | 1 (14)                              |
| Musculoskeletal and connective tissue disorders |                                     |
| Any event                                       | 4 (57)                              |
| Arthralgia                                      | 1 (14)                              |
| Muscle spasms                                   | 1 (14)                              |
| Musculoskeletal stiffness                       | 1 (14)                              |
| Pain in extremity                               | 1 (14)                              |
| Rheumatoid arthritis                            | 1 (14)                              |
| Investigations                                  |                                     |
| Any event                                       | 3 (43)                              |
| Alanine aminotransferase increased*             | 1 (14)                              |
| Gamma-glutamyltransferase increased             | 1 (14)                              |
| Weight decreased                                | 1 (14)                              |
| Gastrointestinal Disorders, n (%)               |                                     |
| Any Event                                       | 2 (29)                              |
| Abdominal distension                            | 1 (14)                              |
| Nausea                                          | 2 (29)                              |
| Injury, poisoning and procedural complications  |                                     |
| Any event                                       | 2 (29)                              |
| Muscle strain                                   | 1 (14)                              |
| Sunburn                                         | 1 (14)                              |
| Nervous system disorders                        |                                     |
| Any event                                       | 2 (29)                              |
| Dizziness                                       | 1 (14)                              |
| Headache                                        | 1 (14)                              |
| Psychiatric disorders                           |                                     |
| Any event                                       | 1 (14)                              |
| Confusional state                               | 1 (14)                              |
